# Supplementary material for: A “Trojan horse” strategy towards robust Co–N4 active sites accommodated in micropore defect-rich carbon nanosheets for boosting selective hydrogenation of nitroarenes
Source: Royal Society of Chemistry journal article supplement (doi:10.1039/d2ta00862a), 2022-01-01
Supplement: d2ta00862a1.pdf [file d2ta00862a1.pdf]

## *Electronic Supplementary Information*

### **“Trojan Horse” Strategy Towards Robust Co-N<sub>4</sub> Active Sites Accommodated in Micropore Defect-Rich Carbon Nanosheets for Boosting Selective Hydrogenation of Nitroarenes**

*Qingshan Zhao<sup>a</sup>, Wanxin Ni<sup>a</sup>, Xiaojie Tan<sup>a</sup>, Fengliang Cao<sup>a, b</sup>, Tengfei Liu<sup>a</sup>, Hao  
Huang<sup>a</sup>, Zhinian Cheng<sup>a</sup>, Yiwen Li<sup>a</sup>, Shuwei He<sup>a</sup>, Hui Ning<sup>a</sup> and Mingbo Wu<sup>a, b\*</sup>*

<sup>a</sup> State Key Laboratory of Heavy Oil Processing, College of Chemistry and Chemical Engineering, China University of Petroleum (East China), Qingdao 266580, China

<sup>b</sup> Institute of New Energy, College of New Energy, China University of Petroleum (East China), Qingdao 266580, China

\*Corresponding author.

Tel.: (+86) 532 86983452.

E-mail address: wumb@upc.edu.cn

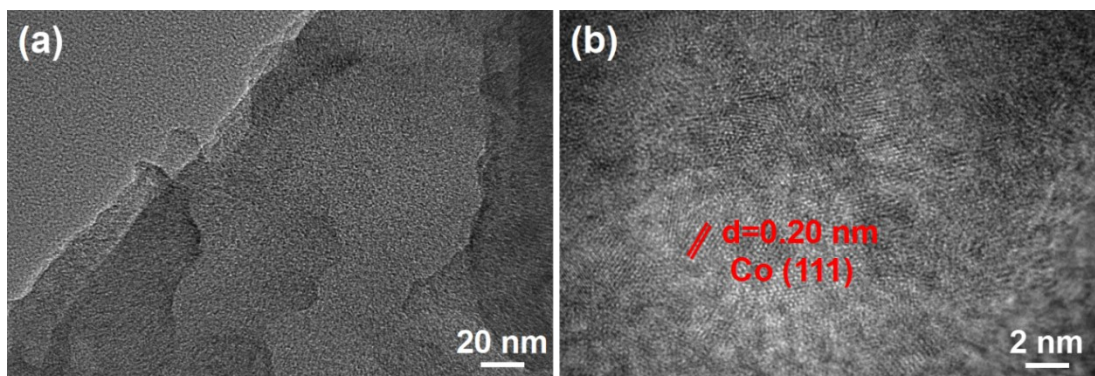

**Fig. S1** TEM images of Co-N-CNS-Th-u (Co-N-CNS-Th-u was prepared through the same procedures with Co-N-CNS-Th except for HCl washing).

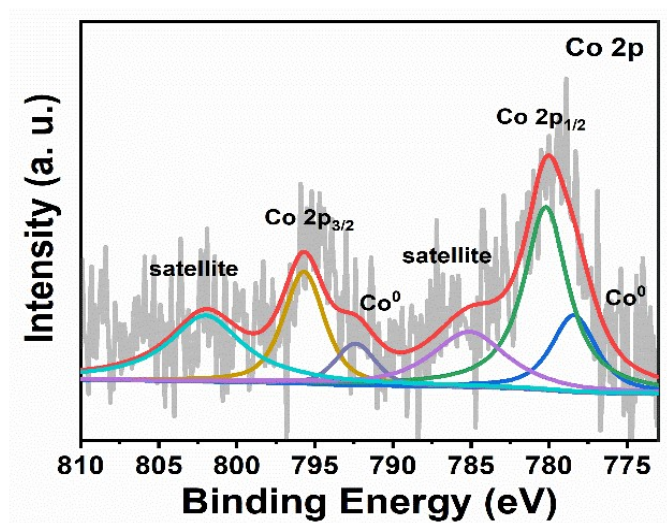

**Fig. S2** Co 2p XPS spectrum of Co-N-CNS-Th-u.

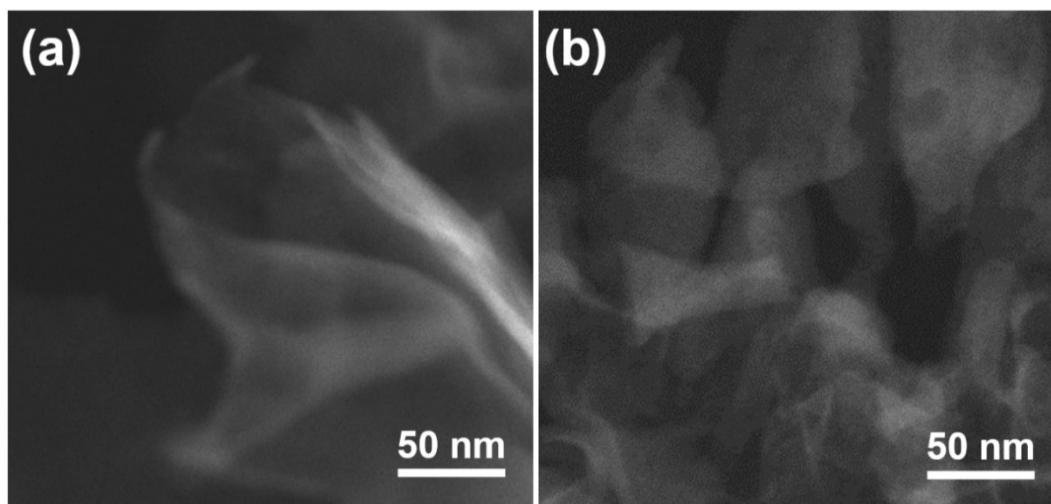

**Fig. S3** TEM images of CNS and Co-N-CNS.

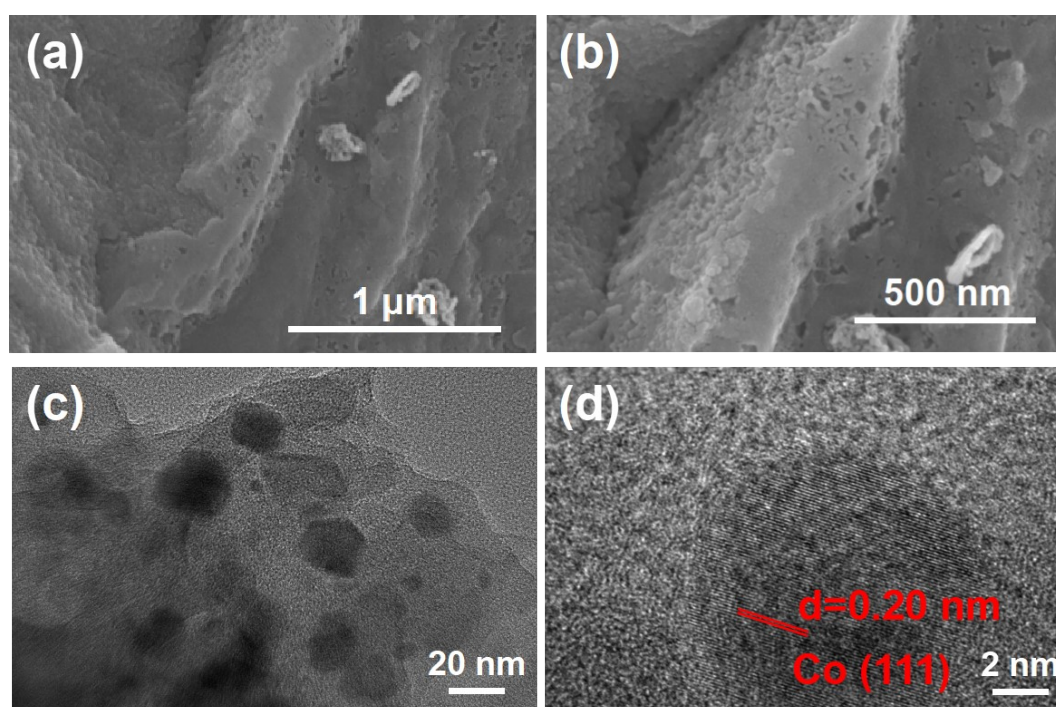

**Fig. S4** (a, b) SEM and (c, d) TEM images of Co-N-C.

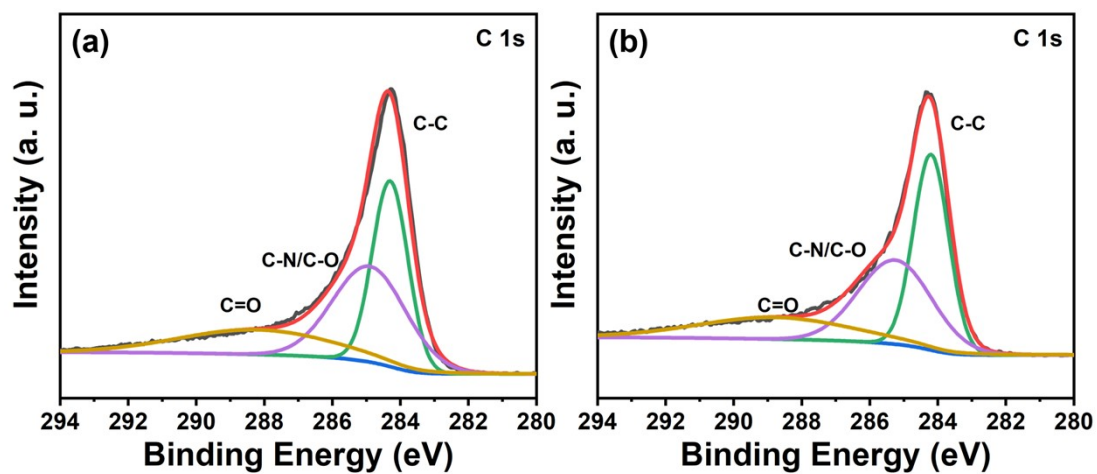

Fig. S5 C 1s XPS spectra of (a) Co-N-CNS-Th and (b) Co-N-CNS.

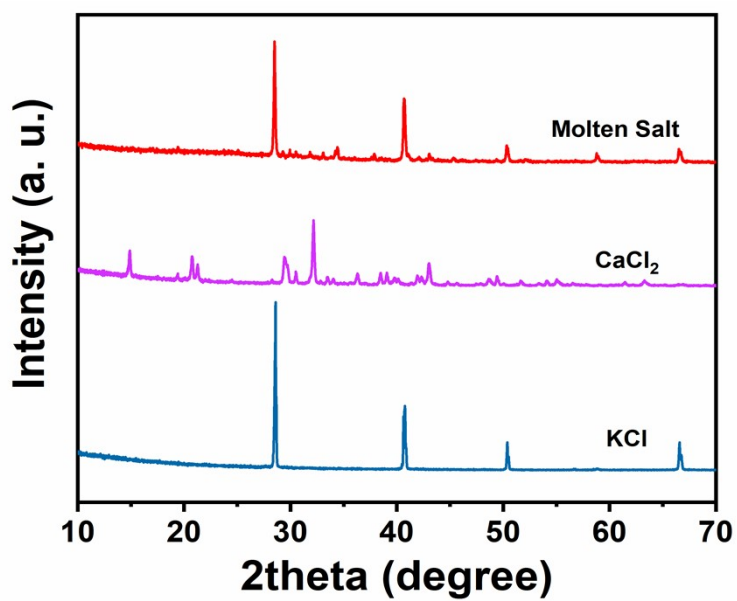

Fig. S6 XRD patterns of the recovered molten salt, KCl, and CaCl<sub>2</sub>.

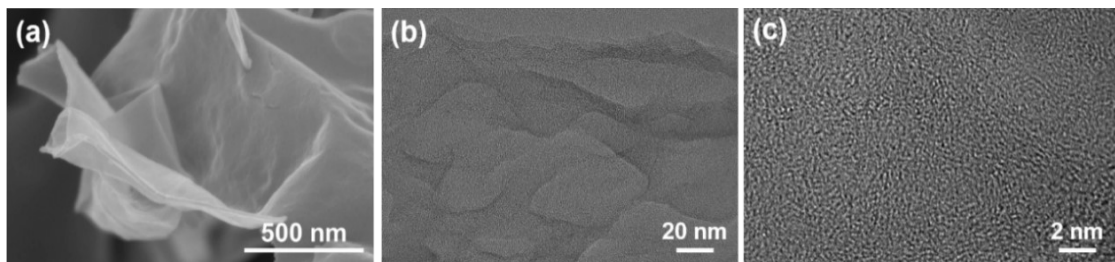

**Fig. S7** (a) SEM and (b, c) TEM images of Co-N-CNS-Th-r.

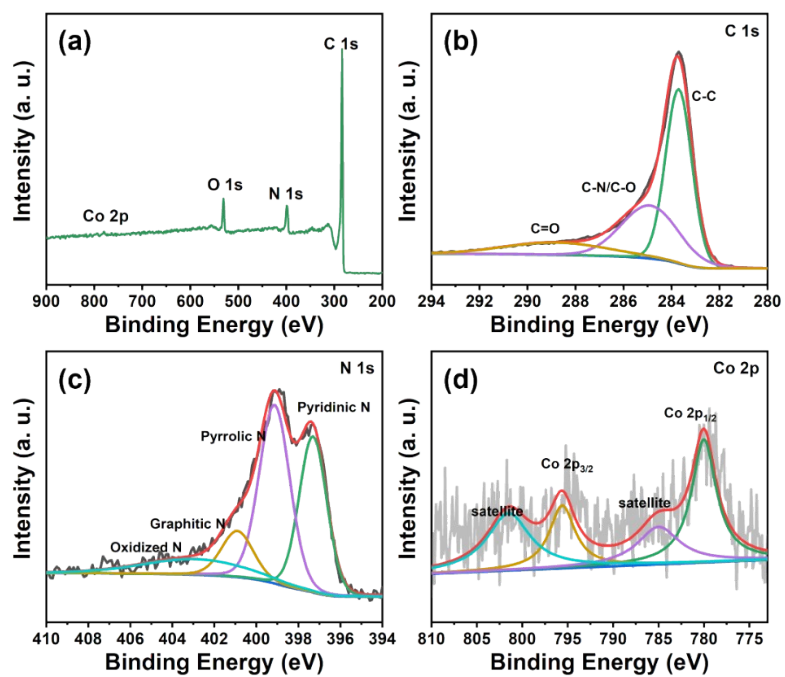

**Fig. S8** (a) XPS survey spectrum, (b) C 1s XPS spectrum, (c) N 1s XPS spectrum, and (d) Co 2p XPS spectrum of Co-N-CNS-r.

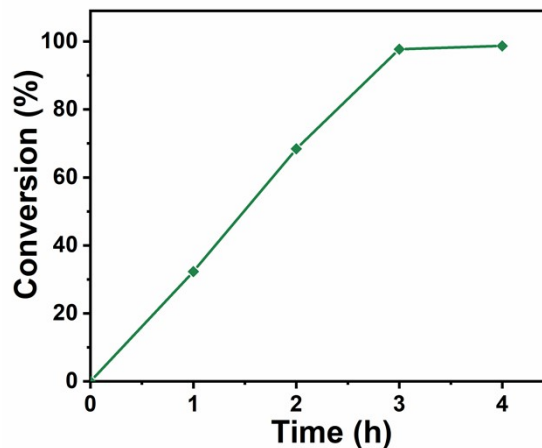

**Fig. S9** Time-dependent catalytic performance of Co-N-CNS-Th-k.

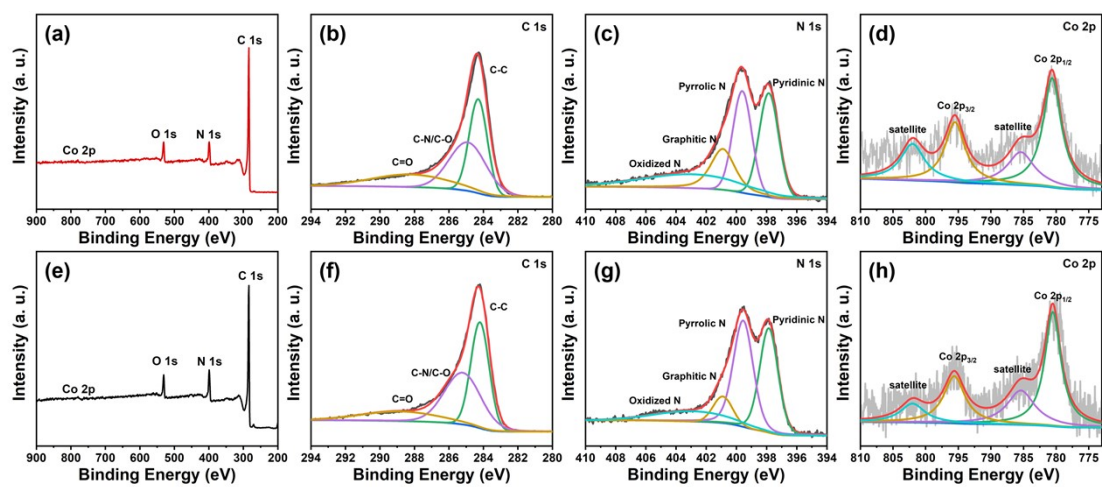

**Fig. S10** (a, e) XPS survey spectra, (b, f) N 1s XPS spectra, (c, g) C 1s XPS spectra, and (d, h) Co 2p XPS spectra of fresh Co-N-CNS-Th and recycled Co-N-CNS-Th after 10 runs.

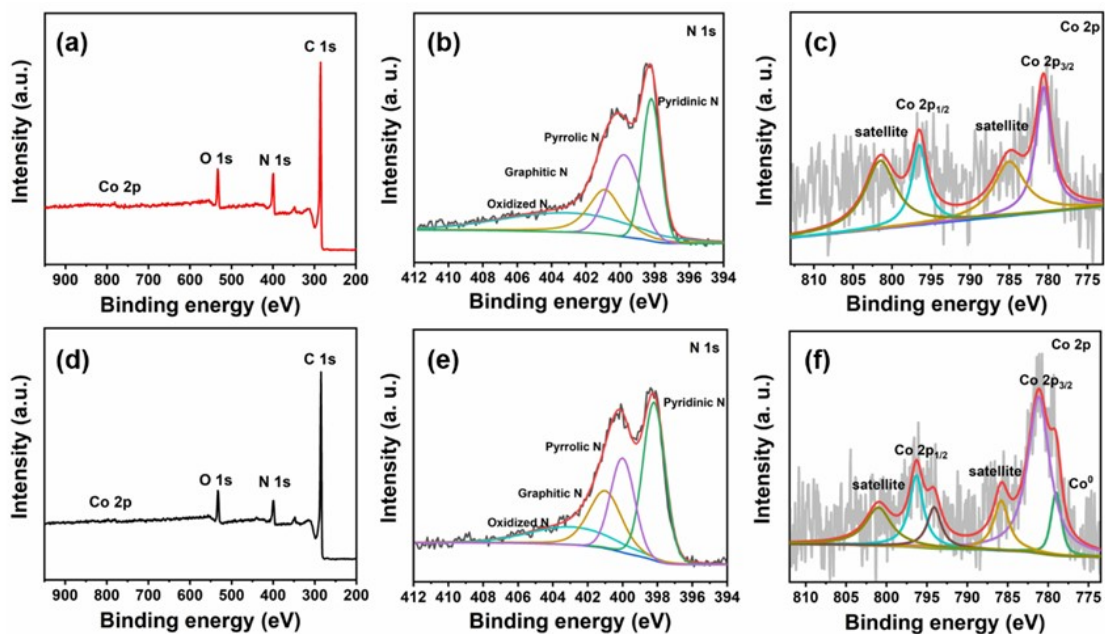

**Fig. S11** (a, d) XPS survey spectra, (b, e) N 1s XPS spectra, and (c, f) Co 2p XPS spectra of collected Co-N-CNS-Th and Co-N-CNS after the H<sub>2</sub>-TPR tests.

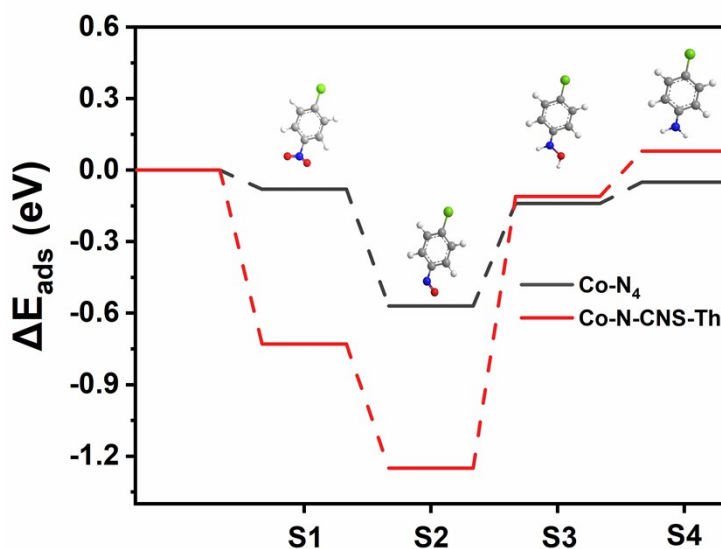

**Fig. S12** Adsorption energies of the intermediates in the selective hydrogenation of *p*-CNB process on regular Co-N<sub>4</sub> configuration embedded in graphene and Co-N<sub>4</sub> sites embedded in the micropore defective Co-N-CNS-Th.

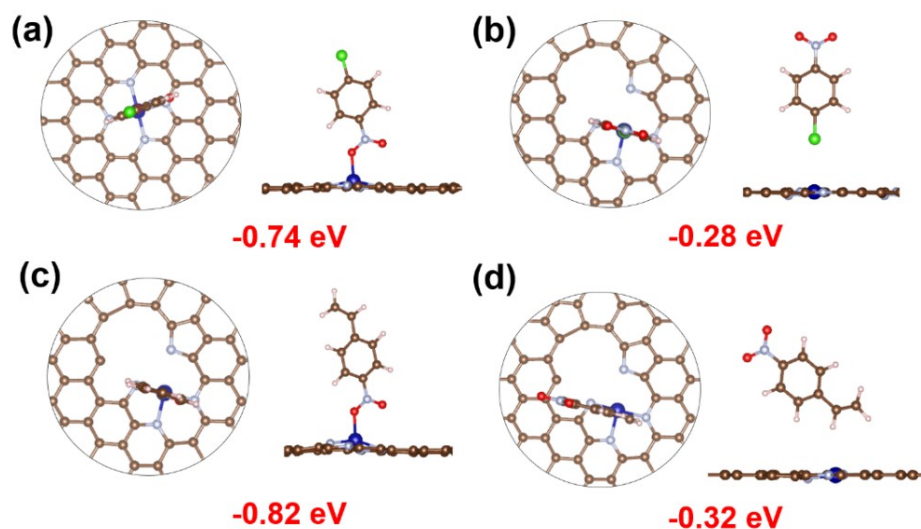

**Fig. S13** Optimized structures and adsorption energies of (a) the  $-\text{NO}_2$  and (b)  $-\text{Cl}$  group in  $p$ -CNB. Optimized structures and adsorption energies of (c) the  $-\text{NO}_2$  and (b)  $-\text{CH}=\text{CH}_2$  group in  $p$ -nitrostyrene.

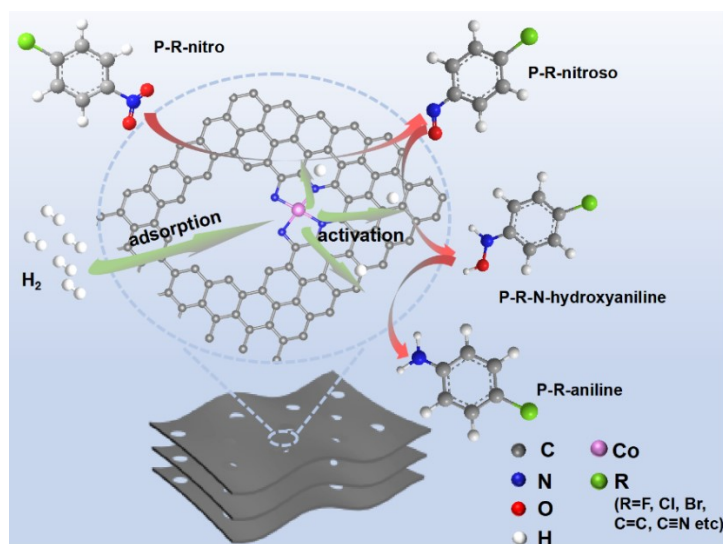

**Fig. S14** Illustration for the reaction path of  $p$ -CNB hydrogenation over Co-N-CNS-Th.



**Table S1.** Physical properties of CNS, Co-N-CNS and Co-N-CNS-Th.

| Entry | Catalyst    | $I_D/I_G$ | Surface area ( $\text{m}^2 \text{g}^{-1}$ ) |
|-------|-------------|-----------|---------------------------------------------|
| 1     | CNS         | 0.98      | 198                                         |
| 2     | Co-N-CNS    | 1.12      | 608                                         |
| 3     | Co-N-CNS-Th | 1.18      | 698                                         |

**Table S2.** Structural parameters extracted from the Co K-edge EXAFS fitting.

| Sample      | Path    | CN  | R( $\text{\AA}$ ) | $\sigma^2(\times 10^{-3} \text{\AA}^2)$ | $\Delta E_0(\text{eV})$ | R factor |
|-------------|---------|-----|-------------------|-----------------------------------------|-------------------------|----------|
| Co foil     | Co-Co   | 12  | 2.49              | 7                                       | 7.4                     | 0.0003   |
| Co-N-CNS-Th | Co-N(O) | 4.0 | 1.87              | 7                                       | -9.0                    | 0.014    |
| Co-N-CNS    | Co-N(O) | 4.3 | 1.87              | 2.8                                     | -7.1                    | 0.014    |
|             | Co-Co   | 0.4 | 2.47              | 1.3                                     |                         |          |

**Table S3.** The molar and mass composition of Co-N-CNS-Th before and after the cycling test determined by XPS and ICP-OES.

| Element         | XPS    |        |        | ICP-OES |         |
|-----------------|--------|--------|--------|---------|---------|
|                 | C/at.% | N/at.% | O/at.% | Co/at.% | Co/wt.% |
| Before reaction | 83.25  | 10.35  | 6.21   | 0.18    | 0.59    |
| After 10 runs   | 82.20  | 11.11  | 6.48   | 0.21    | 0.61    |

**Table S4.** Catalytic performances of related cobalt-based catalysts for the selective hydrogenation of nitroarenes.

| Entry | Catalyst                      | Reaction conditions                                    | TOF (h <sup>-1</sup> ) |           |
|-------|-------------------------------|--------------------------------------------------------|------------------------|-----------|
| 1     | Co-N-CNS-Th                   | 2 MPa H <sub>2</sub> , 100 °C                          | 169.8                  | This work |
| 2     | Co-N-CNS                      | 2 MPa H <sub>2</sub> , 100 °C                          | 112.4                  | This work |
| 3     | Co-N-CNS-Th                   | N <sub>2</sub> H <sub>4</sub> ·H <sub>2</sub> O, 80 °C | 345.0                  | This work |
| 4     | Co-N-CNS-Th                   | NaBH <sub>4</sub> , 30 °C                              | 10188.6                | This work |
| 5     | Co@NC-1                       | H <sub>2</sub> , 1 MPa, 30 °C                          | 12.3                   | Ref. 1    |
| 6     | Co-N-C                        | H <sub>2</sub> , 3 MPa, 80 °C                          | 35.9                   | Ref. 2    |
| 7     | H-Co-N-C@SiO <sub>2</sub> -20 | H <sub>2</sub> , 2.7 MPa, 110 °C                       | 146.0                  | Ref. 3    |
| 8     | Co@CN-400                     | H <sub>2</sub> , 1 MPa, 60 °C                          | 4.8                    | Ref. 4    |
| 9     | Co/CoO @Carboon               | H <sub>2</sub> , 4 MPa, 120 °C                         | 25.2                   | Ref. 5    |
| 10    | Co@mesoNC                     | H <sub>2</sub> , 3 MPa, 110 °C                         | 42.0                   | Ref. 6    |
| 11    | Co@NC-800                     | N <sub>2</sub> H <sub>4</sub> ·H <sub>2</sub> O, 80 °C | 39.8                   | Ref. 7    |
| 12    | Fe-Ni NPs                     | NaBH <sub>4</sub> , 30 °C                              | 17.1                   | Ref. 8    |

**Table S5.** Elemental contents of collected Co-N-CNS-Th and collected Co-N-CNS after the H<sub>2</sub>-TPR tests.

| <b>Sample</b>         | <b>C/at. %</b> | <b>N/at. %</b> | <b>O/at. %</b> | <b>Co/at. %</b> |
|-----------------------|----------------|----------------|----------------|-----------------|
| Fresh Co-N-CNS-Th     | 69.14          | 19.50          | 10.97          | 0.39            |
| Collected Co-N-CNS-Th | 79.08          | 10.50          | 10.15          | 0.26            |

**Table S6.** Absorption tests of *p*-CNB on CNS, Co-N-CNS, and Co-N-CNS-Th.

| <b>Sample</b> | <b>Absorption quantity (<math>\mu\text{mol g}^{-1}</math>)</b> |
|---------------|----------------------------------------------------------------|
| CNS           | 11                                                             |
| Co-N-CNS      | 302                                                            |
| Co-N-CNS-Th   | 353                                                            |

## Reference

1. R. J. Gao, L. Pan, Z. W. Li, X. W. Zhang, L. Wang and J. J. Zou, *Chin. J. Catal.*, 2018, **39**, 664-672.
2. W. G. Liu, L. L. Zhang, W. S. Yan, X. Y. Liu, X. F. Yang, S. Miao, W. T. Wang, A. Q. Wang and T. Zhang, *Chem Sci*, 2016, **7**, 5758-5764.
3. X. C. Lan, B. Ali, Y. Wang and T. F. Wang, *ACS Appl. Mater. Interfaces*, 2020, **12**, 3624-3630.
4. Y. L. Cao, K. K. Liu, C. Wu, H. P. Zhang and Q. Y. Zhang, *Applied Catalysis A-General*, 2020, **592**.
5. B. Chen, F. Li, Z. Huang and G. Yuan, *Chemcatchem*, 2016, **8**, 1132-1138.
6. X. Sun, A. I. Olivos-Suarez, D. Osadchii, M. J. V. Romero, F. Kapteijn and J. Gascon, *Journal of Catalysis*, 2018, **357**, 20-28.
7. S. Chen, L.-L. Ling, S.-F. Jiang and H. Jiang, *Green Chemistry*, 2020, **22**, 5730-5741.
8. D. R. Petkar, B. S. Kadu and R. C. Chikate, *RSC Advances*, 2014, **4**, 8004-8010.
